# Supplementary material for: Swedish snuff (snus) and risk of cardiovascular disease and mortality: prospective cohort study of middle-aged and older individuals
Source: PubMed Central journal article supplement (PMC8103653; doi:10.1186/s12916-021-01979-6), 2021-05-07
Supplement: 12916_2021_1979_MOESM1_ESM.pdf [file 12916_2021_1979_MOESM1_ESM.pdf]

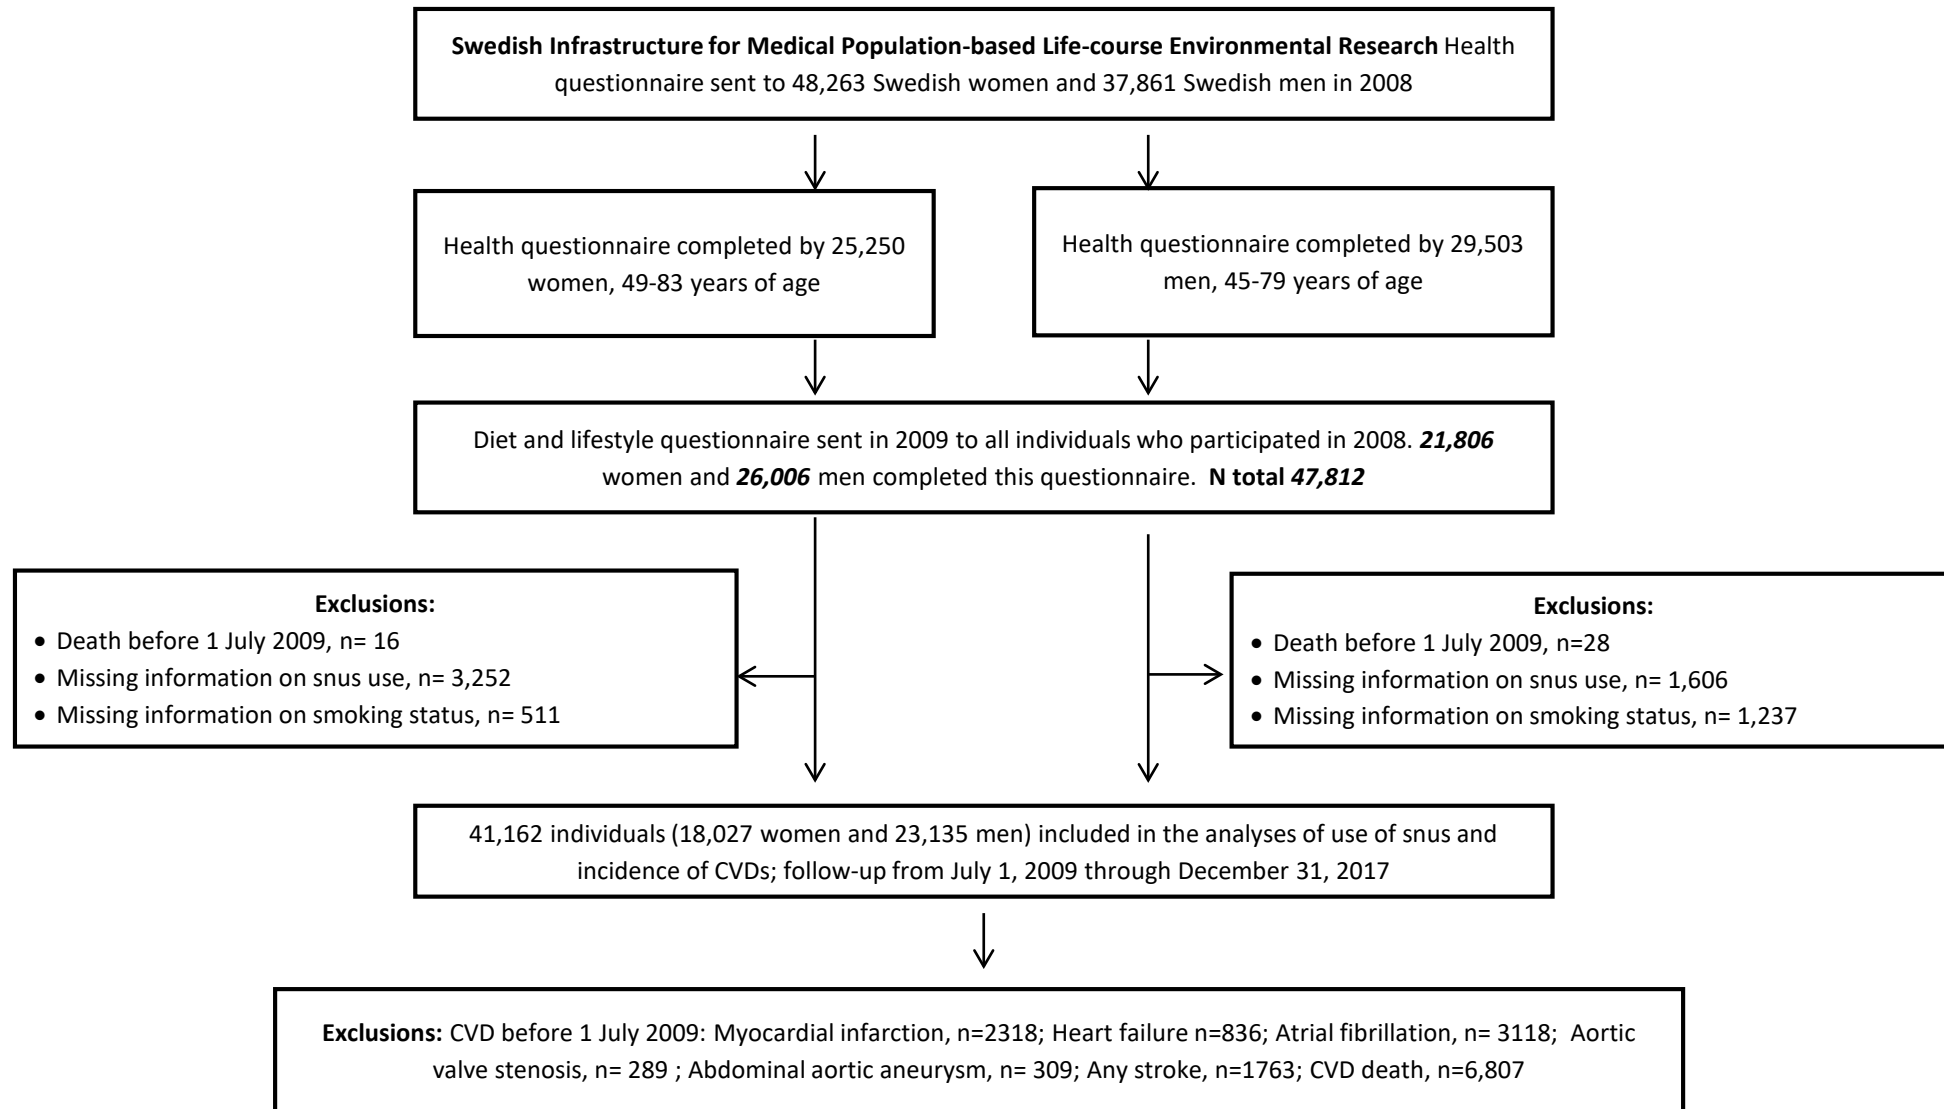

**Additional file 1.** Flow chart of study participants
